# Supplementary material for: Fatty acid metabolism and colon cancer protection by dietary methyl donor restriction
Source: PubMed Central journal article supplement (PMC8416812; doi:10.1007/s11306-021-01831-1), 2021-09-03
Supplement: 11306_2021_1831_MOESM1_ESM.pdf [file 11306_2021_1831_MOESM1_ESM.pdf]

## **Fatty acid metabolism and colon cancer protection by dietary methyl donor restriction**

Oladimeji Aladelokun<sup>1\*</sup>, Matthew Hanley<sup>1</sup>, Jinjian Mu<sup>2</sup>, John C. Giardina<sup>3</sup>, Daniel W. Rosenberg<sup>1</sup>, Charles Giardina<sup>4</sup>

<sup>1</sup>Center for Molecular Oncology, University of Connecticut Health Center, Farmington, Connecticut.

<sup>2</sup>Statistical Consulting Services, University of Connecticut, Storrs, Connecticut.

<sup>3</sup>Center for Health Decision Science, Harvard T.H. Chan School of Public Health, Massachusetts.

<sup>4</sup>Department of Molecular and Cellular Biology, University of Connecticut, Storrs, Connecticut

Running Title: Modulation of lipid metabolism by dietary methyl donors and CRC development

**\*Corresponding Author:** Oladimeji Aladelokun, The University of Connecticut School of Medicine 263 Farmington Ave., Farmington, CT 06030-3101. Email: oladimeji.aladelokun@uconn.edu

### **Supplementary Figure 1: MDD alters levels of metabolites involved in one carbon metabolism.**

MDD diet caused a significant reduction in the level of: (A) dimethylglycine (-6.0,  $p < 0.0001$ ), and (B) cystine (-4.0,  $p < 0.0001$ ). All groups marked with “a” have a statistically significant difference compared to groups marked with “b”.

**Supplementary Table 1:** A list of 33 metabolites identified as significant predictors of tumor count using elastic net analysis.

### **Supplementary Figure 2: Impact of MDD on COX2/mPGES-1 expression in colon cancer.**

(a) Representative image from immunohistochemistry (IHC) for mPGES-1 reveals that MDD causes a reduced expression of mPGES-1. *Note the absence of mPGES-1 positive cells within the MDD colon section.* (b) Similarly, mRNA levels of *mPGES-1* was downregulated in normal mucosa (-2.6-fold) and colon tumors (-2.1-fold) under conditions of methyl donor restriction. Elevated

mPGES-1 in the MDS control mice suggests an accelerated production of prostaglandins, known to be pro-tumorigenic. (c) Downregulation of *COX2* mRNA level in the normal mucosa (-1.5-fold) and colon tumors (-5.0-fold) is noticeable after MDD, implicating the arachidonic acid-metabolizing enzyme as a mediator in colon tumorigenesis, a pathway potentially inhibited by MDD. These figures were generated from a conditional Apc mouse (*Cdx2-Cre<sup>ERT2</sup>;Apcf1/fl*) on the MDD and MDS diets. Mice were treated with three consecutive daily doses of tamoxifen (100 mg/kg). Three weeks after tamoxifen treatment, mice were euthanized and colon tissue was prepared for IHC or RNA analysis. IHC was performed using mPGES1 antibody (Cayman, Catalog #160140). RNA was quantified by Qubit and used to synthesize cDNA (iTaQ kit) and analyzed by real-time PCR using SYBR green (BioRad). Primers were designed using Primer3 software. Statistical significance was assessed by one-way analysis of variance (ANOVA). All groups marked with "a" have a statistically significant difference compared to groups marked with "b" or "c" or "d". Similarly, all groups marked with "b" have a significantly significant difference compared to groups marked with "a", "c" or "d".

**Supplementary Figure 3:** Box plots of metabolites identified as significant predictors of tumor count using the elastic net analysis. These metabolites failed normality tests, so comparisons were done using nonparametric MANOVA test. Overall metabolites levels differed significantly between diet groups ( $p = 0.01$ ). Bonferroni correction to adjust for multiple comparisons (6 hypotheses were tested with  $\alpha = 0.05$ ).

**Supplementary Figure 4:** Box plots of metabolites identified as significant predictors of tumor count using elastic net analysis.

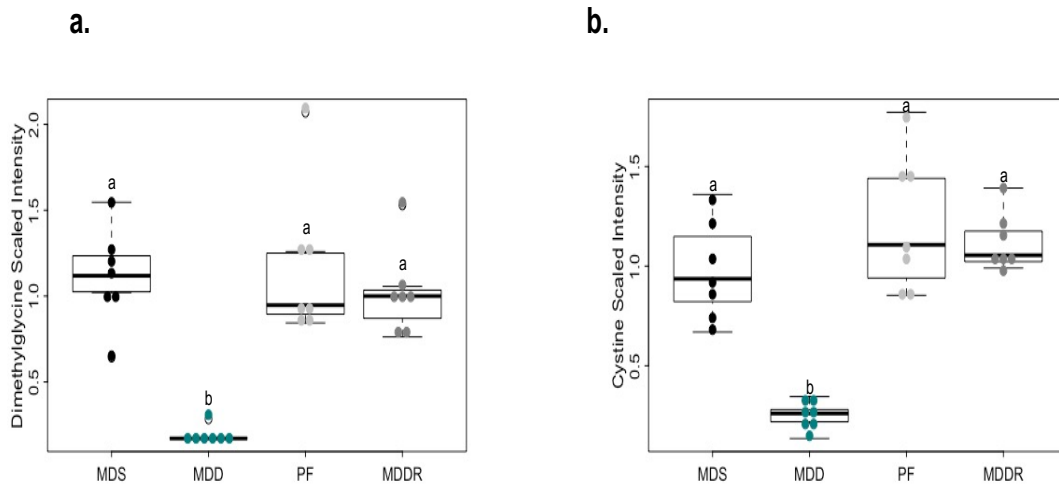

**Supplementary Table 1:** Metabolites identified as significant predictors of tumor count using elastic net.

| Metabolites                        | Coefficient | MSI level* |
|------------------------------------|-------------|------------|
| Azelaate                           | 0.0878      | 1          |
| 7 $\alpha$ -hydroxycholesterol     | 0.0865      | 1          |
| Pyrophosphate                      | 0.0447      | 1          |
| Vitamin B12                        | 0.0324      | 1          |
| Taurine                            | 0.0268      | 1          |
| 5-Hydroxyindoleacetate             | 0.0250      | 1          |
| 1-Oleoylglycerophosphoethanolamine | 0.0227      | 1          |
| Arachidonate                       | 0.022       | 1          |

| Metabolites                    | Coefficient | MSI level* |
|--------------------------------|-------------|------------|
| 4-Hydroxyphenylacetate         | 0.0168      | 1          |
| 12-HETE                        | 0.0074      | 1          |
| Sucrose                        | 0.0052      | 1          |
| Guanosine                      | 0.0028      | 1          |
| 7 $\beta$ -hydroxycholesterol  | 0.0024      | 1          |
| 3-Sulfooxyphenylpropanoic Acid | 0.0017      | 1          |
| Mannitol                       | -0.0010     | 1          |
| Vitamin C                      | -0.0030     | 1          |
| 2-monolinolein                 | -0.0033     | 1          |
| Valerylcarnitine               | -0.0036     | 1          |
| Citrate                        | -0.0045     | 1          |
| Cholestanol                    | -0.0052     | 1          |
| Indolelactate                  | -0.0053     | 1          |
| Xylitol                        | -0.0066     | 1          |
| Valerylglycine                 | -0.009      | 1          |
| Urate                          | -0.0153     | 1          |
| 2-Hydroxybutyrate              | -0.0168     | 1          |
| Isobutyrylcarnitine            | -0.0203     | 1          |

| Metabolites            | Coefficient | MSI level* |
|------------------------|-------------|------------|
| Beta_hydroxypyruvate   | -0.0212     | 1          |
| Pro_hydroxy_pro        | -0.0244     | 1          |
| 3 ureidopropionate     | -0.0323     | 1          |
| Creatinine             | -0.0364     | 1          |
| Methylbutyrylcarnitine | -0.0390     | 1          |
| $\beta$ -sitosterol    | -0.0864     | 1          |
| Succinate              | -0.0959     | 1          |

\*Metabolomics standards initiative (MSI) level is based on MSI guidelines for naming non-novel metabolites (Sumner et al., 2007). Selected metabolites in this dataset are classified as “Tier 1”.

Supplemental Figure 2

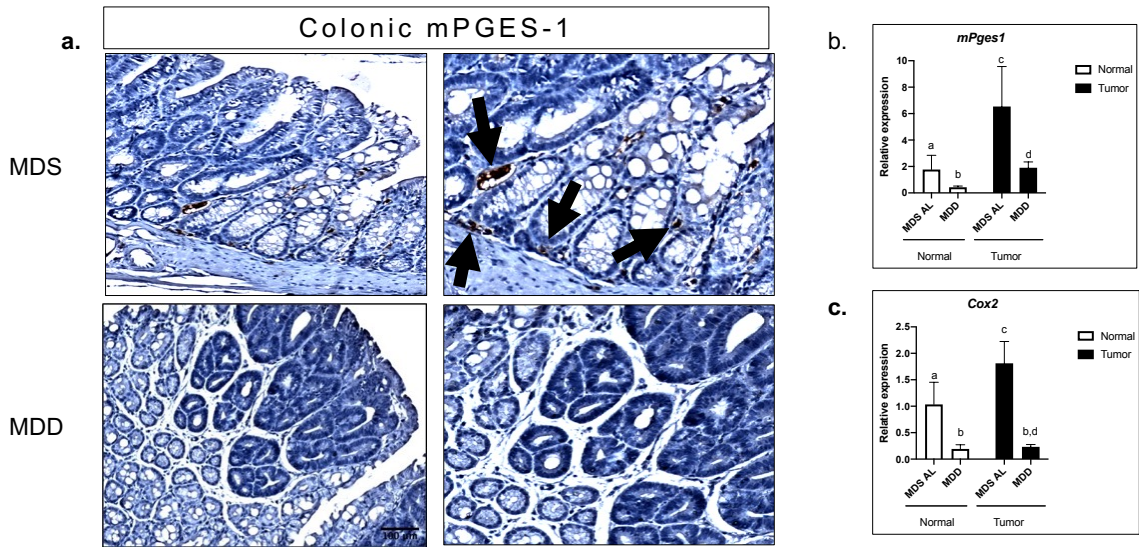

Supplemental Figure 3

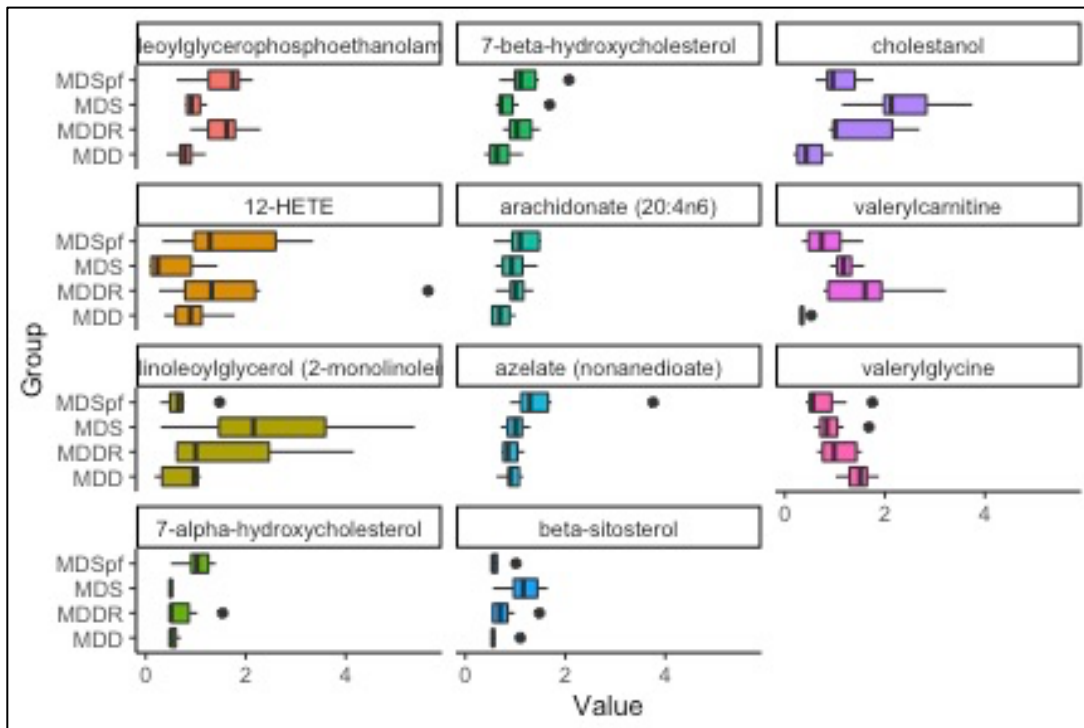

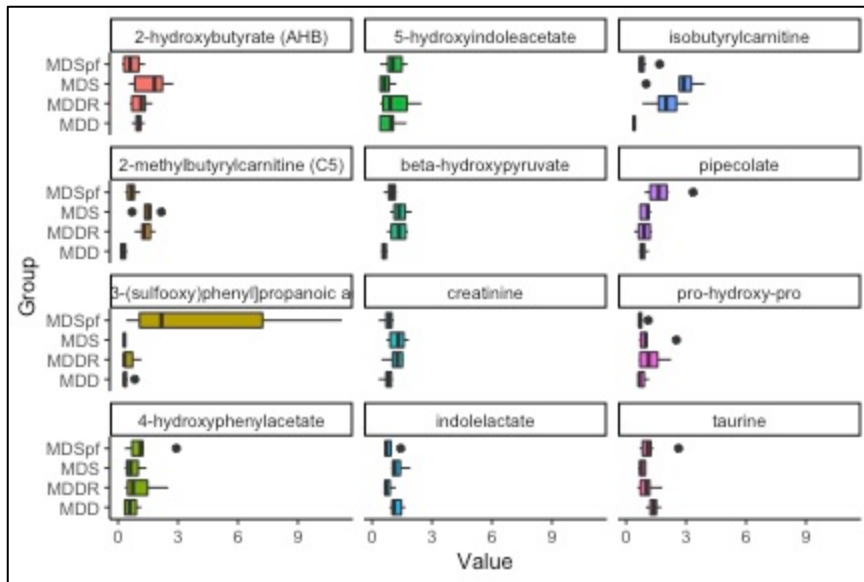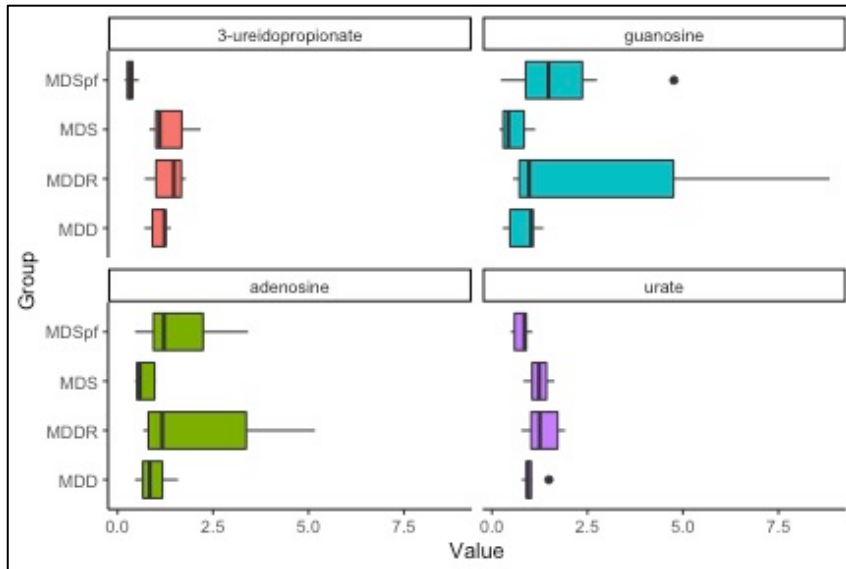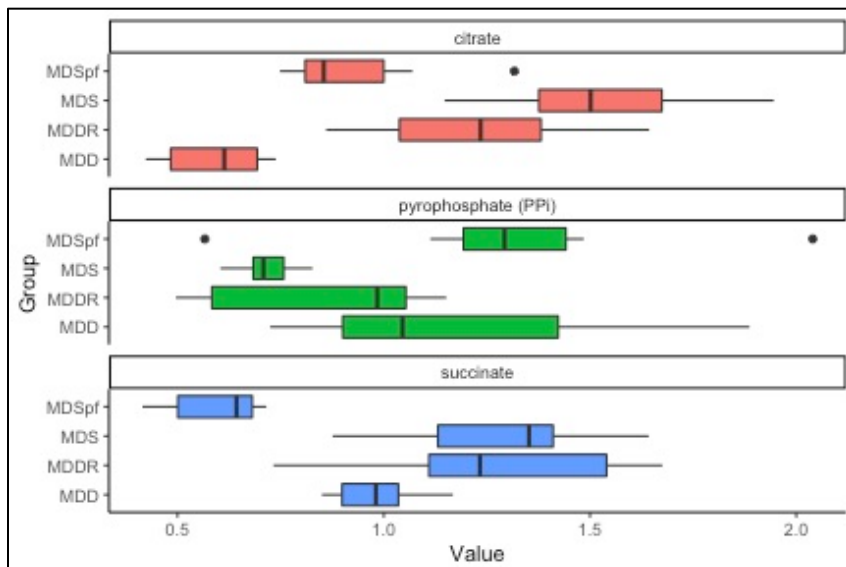

Supplementary Figure 4

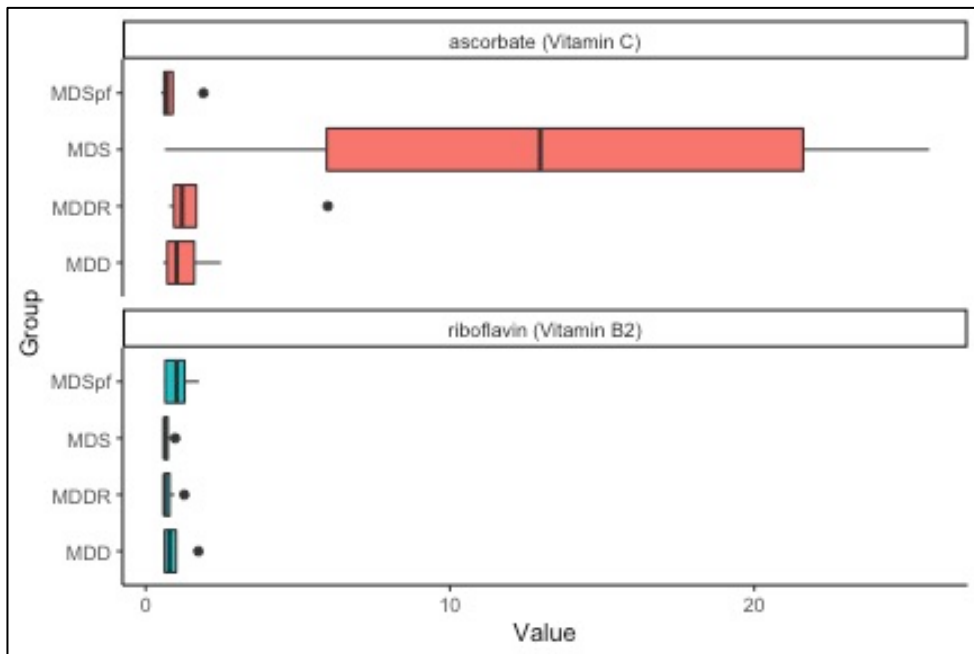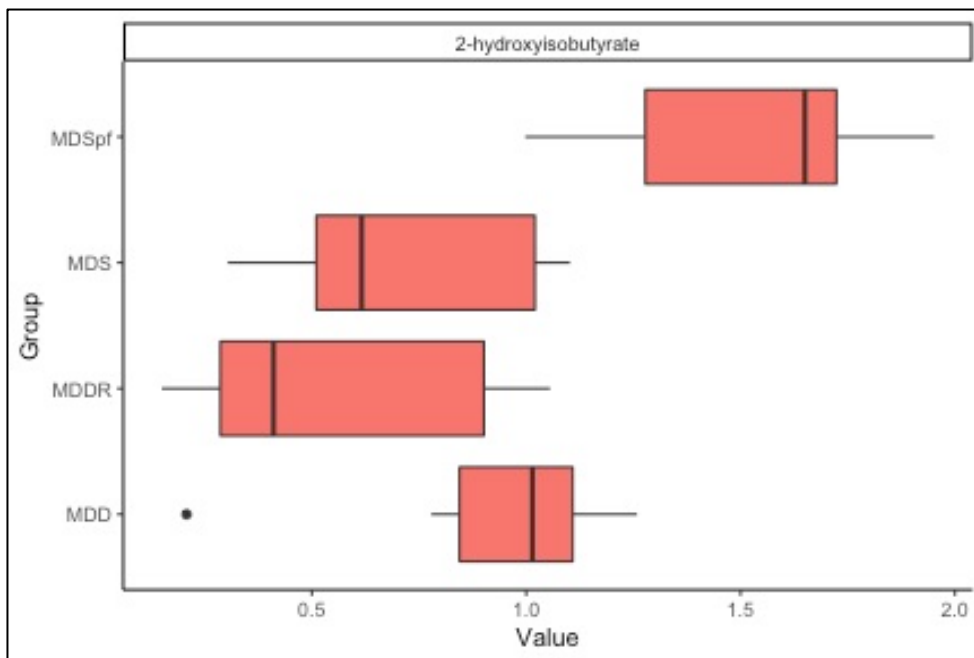



**Supplementary Table 2: Composition of MDS and MDD diets**

| <b>Component</b>                          | <b>MDS diet (g/kg)</b> | <b>MDD diet (g/kg)</b> |
|-------------------------------------------|------------------------|------------------------|
| L-Alanine                                 | 3.5                    | 3.5                    |
| L- Arginine HCl                           | 12.1                   | 12.1                   |
| L-Asparagine                              | 6                      | 6                      |
| L-Aspartic acid                           | 3.5                    | 3.5                    |
| L-Cystine                                 | 3.5                    | 3.5                    |
| L-Glutamic Acid                           | 40.0                   | 40.0                   |
| Glycine                                   | 23.3                   | 23.3                   |
| L-Histidine HCl, monohydrate              | 4.5                    | 4.5                    |
| L-Isoleucine                              | 8.2                    | 8.2                    |
| L-Leucine                                 | 11.1                   | 11.1                   |
| L-Lysine HCl                              | 18.0                   | 18.0                   |
| <b>L-Methionine</b>                       | <b>8.2</b>             | <b>0</b>               |
| L-Phenylalanine                           | 7.5                    | 7.5                    |
| L-Proline                                 | 3.5                    | 3.5                    |
| L-Serine                                  | 3.5                    | 3.5                    |
| L-Threonine                               | 8.2                    | 8.2                    |
| L-Tryptophan                              | 1.8                    | 1.8                    |
| L-Tyrosine                                | 5.0                    | 5.0                    |
| L-Valine                                  | 8.2                    | 8.2                    |
| Sucrose                                   | 351.68                 | 351.68                 |
| Corn Starch                               | 150.0                  | 150.0                  |
| Maltodextrin                              | 150.0                  | 150.0                  |
| Soybean Oil                               | 80                     | 80                     |
| Cellulose                                 | 30.0                   | 30.0                   |
| Mineral Mix, AIN-93M-MX                   | 35.0                   | 35.0                   |
| Calcium Phosphate, monobasic, monohydrate | 8.2                    | 8.2                    |
| Vitamin Mix, AIN-93-VX                    | 13.0                   | 13.0                   |
| <b>Choline Bitartrate</b>                 | <b>2.5</b>             | <b>0</b>               |
| Niacin                                    | 0.039                  | 0.039                  |
| Calcium Pantothenate                      | 0.0208                 | 0.0208                 |
| Pyridoxine HCl                            | 0.0091                 | 0.0091                 |
| Thiamin HCl                               | 0.0078                 | 0.0078                 |
| Riboflavin                                | 0.0078                 | 0.0078                 |
| <b>Folic Acid</b>                         | <b>0.0026</b>          | <b>0</b>               |
| TBHQ, antioxidant                         | 0.02                   | 0.02                   |
| Biotin                                    | 0.0003                 | 0.0003                 |
| <b>Vitamin B12 (0.1% in mannitol)</b>     | <b>0.0325</b>          | <b>0</b>               |
| Vitamin E DL-alpha tocopheryl acetate     | 0.195                  | 0.195                  |
| Vitamin A Palmitate                       | 0.0104                 | 0.0104                 |
| Vitamin D3 (cholecalciferol)              | 0.0026                 | 0.0026                 |
| Vitamin K12 (phyloquinone)                | 0.001                  | 0.001                  |
| DL-Homocystine                            | 0                      | 9                      |

## Reference

Sumner, L. W., Amberg, A., Barrett, D., Beale, M. H., Beger, R., Daykin, C. A., Fan, T. W., Fiehn, O., Goodacre, R., Griffin, J. L., Hankemeier, T., Hardy, N., Harnly, J., Higashi, R., Kopka, J., Lane, A. N., Lindon, J. C., Marriott, P., Nicholls, A. W., Reily, M. D., Thaden, J. J., & Viant, M. R. (2007, Sep). Proposed minimum reporting standards for chemical analysis Chemical Analysis Working Group (CAWG) Metabolomics Standards Initiative (MSI). *Metabolomics*, 3(3), 211-221. <https://doi.org/10.1007/s11306-007-0082-2>
